# Supplementary material for: The crystal plane effect of CoFe nanocrystals on Fischer–Tropsch synthesis
Source: Royal Society of Chemistry journal article supplement (doi:10.1039/c4ta02425g), 2014-01-01
Supplement: c4ta02425g1.pdf [file c4ta02425g1.pdf]

## Electronic Supplementary Information

### Crystal Plane Effect of CoFe Nanocrystals on Fischer-Tropsch Synthesis

Jiaqiang Sun,<sup>\*a</sup> Shenke Zheng,<sup>a,b</sup> Kui Zhang,<sup>a</sup> Dechen Song,<sup>b</sup> Yanting Liu,<sup>a</sup> Xiaodong Sun<sup>a</sup> and Jiangang Chen<sup>a</sup>

Received (in XXX, XXX) Xth XXXXXXXXXX 20XX, Accepted Xth XXXXXXXXXX 20XX

DOI: 10.1039/b000000x

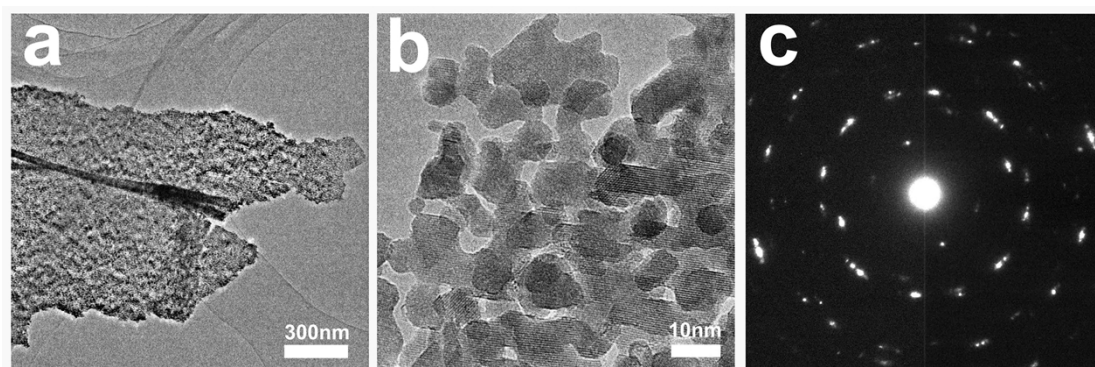

**Figure S1** HRTEM (a, b) and SAED (c) patterns of the CoFe nanosheet after fast reductions.

**Table S1** Catalytic activity and product selectivity of a variety of catalysts

| Catalyst                     | CO conversion<br>(Cmol%) | FTY<br>( $\mu\text{mol}_{\text{CO}} \cdot \text{g}_{\text{cat}}^{-1} \cdot \text{s}^{-1}$ ) | Selectivity<br>(Cmol%) |                        |                 | Reference  |
|------------------------------|--------------------------|---------------------------------------------------------------------------------------------|------------------------|------------------------|-----------------|------------|
|                              |                          |                                                                                             | CH <sub>4</sub>        | C <sub>2-4</sub>       | C <sub>5+</sub> |            |
| CoFe nanowires <sup>a</sup>  | 43.7                     | 10.18                                                                                       | 31.3                   | 50.2                   | 18.5            | this study |
| CoFe nanosheets <sup>a</sup> | 13.0                     | 2.98                                                                                        | 40.7                   | 44.2                   | 15.1            | this study |
| Co <sup>b</sup>              | 12.5                     | -                                                                                           | 59.1                   | 34.4(C <sub>2+</sub> ) | -               | 1          |
| AFe <sup>c</sup>             | -                        | 1.4                                                                                         | 54                     | 42                     | 2               | 2          |
| BFe <sup>c</sup>             | -                        | 0.2                                                                                         | 78                     | 15                     | 7               | 2          |

<sup>a</sup> Reaction conditions: T=300 °C, P=2.0 MPa, H<sub>2</sub>/CO=2;

<sup>b</sup> Reaction conditions: T=300 °C, P=1.0 MPa, H<sub>2</sub>/CO=2;

<sup>c</sup> Reaction conditions: T=350 °C, P=0.1 MPa, H<sub>2</sub>/CO=1.

1 M. L. Smith, N. Kumar and J. J. Spivey, *The Journal of Physical Chemistry C*, 2012, **116**, 7931-7939.

2 H. M. Torres Galvis, A. C. J. Koeken, J. H. Bitter, T. Davidian, M. Ruitenbeek, A. I. Dugulan and K. P. de Jong, *Journal of Catalysis*, 2013, **303**, 22-30.
